# Supplementary material
Source: publisher figshare collection journal article supplement (https://karger.figshare.com/articles/dataset/_/4964873)
Supplement: Supplementary file 1 [file 2]

**Video S1. Live cell imaging of MSU-stimulated neutrophils**

Neutrophils (5x106 PMN/ml) were stimulated with MSU for 1h at 37ºC. Then, after gentle pipetting, crystals were removed by centrifugation and pellets were suspended in fresh medium, seeded on poly-L-lysine-coated Cellview glass bottom dishes (Greiner Bio One). Cells were immediately monitored by live cell imaging in a humidified atmosphere containing 5% CO2 at 37°C in two different channels: differential interface contrast (DIC) and the cell impermeable DNA dye Sytox Green (green).
